# Supplementary material for: Highly selective and sensitive determination of mercury ions by total-reflection X-ray fluorescence spectrometry
Source: Royal Society of Chemistry journal article supplement (doi:10.1039/d1ja00084e), 2021-01-01
Supplement: d1ja00084e1.pdf [file d1ja00084e1.pdf]

## Electronic Supplementary Information

### Highly selective and sensitive determination of mercury ions by total-reflection X-ray fluorescence spectrometry

**Marcin Musielak,<sup>a</sup> Maciej Serda,<sup>a</sup> Ewa Talik,<sup>b</sup> Anna Gagor,<sup>c</sup> Julia Korzuch,<sup>a</sup> Rafal Sitko<sup>a\*</sup>**

<sup>a</sup> University of Silesia, Institute of Chemistry, Szkolna 9, 40-006 Katowice, Poland

<sup>b</sup> Institute of Physics, University of Silesia, 75 Pulku Piechoty 1, 41-500 Chorzow, Poland

<sup>c</sup> Institute of Low Temperature and Structure Research, Polish Academy of Science, P.O. Box 1410, 50-950  
Wroclaw, Poland

\* Corresponding author. E-mail address: rafal.sitko@us.edu.pl

The synthesized CNT-TSC was characterized by scanning electron microscopy (SEM), Fourier-transform infrared spectroscopy (FT-IR), and X-ray photoelectron spectroscopy (XPS). The SEM image in Fig. S1a indicates that the oxidation of CNTs and further modification with TSC molecules did not cause damage to CNTs structure. The FT-IR spectra of o-CNTs and CNT-TSC presented in Fig. S1b reveals the broad bands at 3300-3500  $\text{cm}^{-1}$  and 2850-2950  $\text{cm}^{-1}$  corresponding to stretching vibration of O-H and the vibration of  $-\text{CH}_2-$  bonds in the lattice<sup>1</sup>. The FT-IR spectra also show the stretching vibration at 1720  $\text{cm}^{-1}$  corresponding to C=O of carboxyl and amide groups and several bands at 1350-1650 attributed to C=C and N-H<sup>1,2</sup>. The broad band at 980-1200  $\text{cm}^{-1}$  corresponds to C-O, O-H of o-CNTs and C-N, N-N of TSC molecule<sup>1,3,4</sup>. The FT-IR spectrum of CNT-TSC also reveals a band at 800-950  $\text{cm}^{-1}$  corresponding to C=S, confirming successful grafting of the TSC molecules to the CNTs<sup>4,5</sup>. The high-resolution C1s, N1s, S2p spectra of CNT-TSC are presented in Fig. S1c. The C1s spectrum shows the five peaks at 284.5, 285.2, 286.0, 286.9, and 289.5 eV assigned to C-C, C-OH, C-O-C, C=O, and N-C=O<sup>1,2,6,7</sup>. The N1s spectrum of CNT-TSC shows two peaks at 399.9 and 401.8 eV assigned to C-NH-NH-C/C-NH-N=C and  $-\text{NH}_2/-\text{NH}_3^+$ , respectively<sup>8,9</sup>. The S2p spectrum of CNT-TSC shows two doublets at 163.8/165.0 and 164.5/165.6 eV corresponding to the contributions of the 2p<sub>3/2</sub> and 2p<sub>1/2</sub> levels of sulfur in the thione/thiol form (C=S/C-SH)<sup>9</sup>, the small peak at 168.7 eV assigned to some impurities ( $\text{SO}_4^{2-}/\text{C-SO}_3$ ,  $\text{SO}_3^{2-}/\text{C-SO}_2$ )<sup>10</sup>.

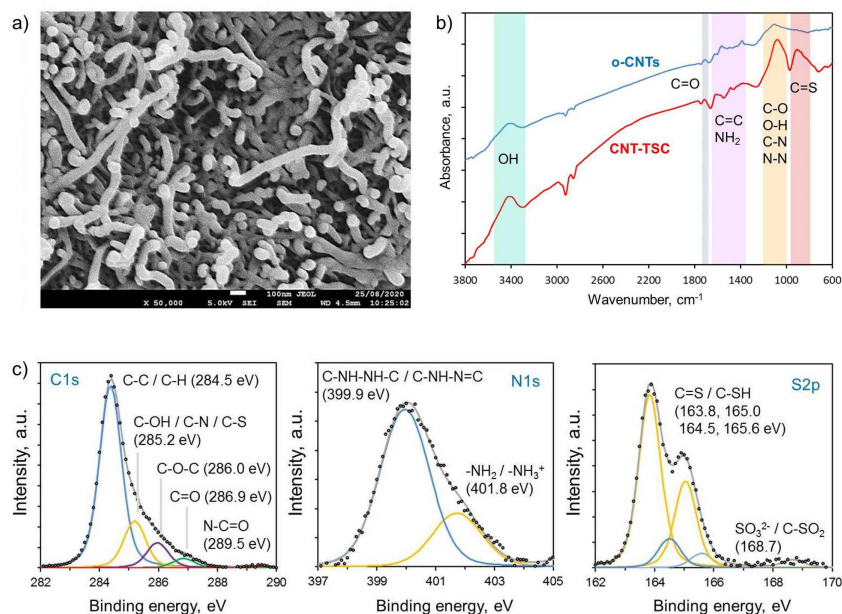

**Fig. S1** The SEM image of CNT-TSC (a), the FT-IR spectra of o-CNTs and CNT-TSC (b), the XPS high-resolution C1s, N1s and S2p spectra of CNT-TSC (c).

## References

- (1) Son, Y. R.; Park, S. J. Green Preparation and Characterization of Graphene Oxide/carbon Nanotubes-Loaded Carboxymethyl Cellulose Nanocomposites. *Sci. Rep.* **2018**, *8* (1), 2–11. <https://doi.org/10.1038/s41598-018-35984-2>.
- (2) Ferreira, F. V.; Francisco, W.; De Menezes, B. R. C.; Cividanes, L. D. S.; Coutinho, A. D. R.; Thim, G. P. Carbon Nanotube Functionalized with Dodecylamine for the Effective Dispersion in Solvents. *Appl. Surf. Sci.* **2015**, *357*, 2154–2159. <https://doi.org/10.1016/j.apsusc.2015.09.202>.
- (3) Verma, S.; Dutta, R. K. A Facile Method of Synthesizing Ammonia Modified Graphene Oxide for Efficient Removal of Uranyl Ions from Aqueous Medium. *RSC Adv.* **2015**, *5* (94), 77192–77203. <https://doi.org/10.1039/c5ra10555b>.
- (4) El-Gammal, O. A.; Rakha, T. H.; Metwally, H. M.; Abu El-Reash, G. M. Synthesis, Characterization, DFT and Biological Studies of Isatinpicolinohydrazone and Its Zn(II), Cd(II) and Hg(II) Complexes. *Spectrochim. Acta - Part A Mol. Biomol. Spectrosc.* **2014**, *127*, 144–156. <https://doi.org/10.1016/j.saa.2014.02.008>.
- (5) Wiles, D. M.; Suprunchuk, T. The Infrared Absorption Spectra of Thiosemicarbazide and Related Compounds: NH<sub>2</sub> and NH Vibrations. *Can. J. Chem.* **1969**, *47* (6), 1087–1089. <https://doi.org/10.1139/v69-173>.
- (6) Ederer, J.; Janoš, P.; Ecorchard, P.; Tolasz, J.; Štengl, V.; Beneš, H.; Perchacz, M.; Pop-Georgievski, O. Determination of Amino Groups on Functionalized Graphene Oxide for Polyurethane Nanomaterials: XPS Quantitation vs. Functional Speciation. *RSC Adv.* **2017**, *7* (21), 12464–12473. <https://doi.org/10.1039/c6ra28745j>.
- (7) de Menezes, B. R. C.; Ferreira, F. V.; Silva, B. C.; Simonetti, E. A. N.; Bastos, T. M.; Cividanes, L. S.; Thim, G. P. Effects of Octadecylamine Functionalization of Carbon Nanotubes on Dispersion, Polarity, and Mechanical Properties of CNT/HDPE Nanocomposites. *J. Mater. Sci.* **2018**, *53* (20), 14311–14327. <https://doi.org/10.1007/s10853-018-2627-3>.
- (8) Liu, G.; Huang, Y.; Qu, X.; Xiao, J.; Yang, X.; Xu, Z. Understanding the Hydrophobic Mechanism of 3-Hexyl-4-Amino-1, 2,4-Triazole-5-Thione to Malachite by ToF-SIMS, XPS, FTIR, Contact Angle, Zeta Potential and Micro-Flotation. *Colloids Surfaces A Physicochem. Eng. Asp.* **2016**, *503*, 34–42. <https://doi.org/10.1016/j.colsurfa.2016.05.028>.
- (9) Li, M.; Zhang, Z.; Li, R.; Wang, J. J.; Ali, A. Removal of Pb(II) and Cd(II) Ions from Aqueous Solution by Thiosemicarbazide Modified Chitosan. *Int. J. Biol. Macromol.* **2016**, *86*, 876–884. <https://doi.org/10.1016/j.ijbiomac.2016.02.027>.
- (10) Lu, Y. C.; Chen, J.; Wang, A. J.; Bao, N.; Feng, J. J.; Wang, W.; Shao, L. Facile Synthesis of Oxygen and Sulfur Co-Doped Graphitic Carbon Nitride Fluorescent Quantum Dots and Their Application for Mercury(ii) Detection and Bioimaging. *J. Mater. Chem. C* **2015**, *3* (1), 73–78. <https://doi.org/10.1039/c4tc02111h>.
